# Supplementary material for: Synthesis and excited state modulation of organic blue light emitters based on 2,4,6-triphenyl-1,3,5-triazine and carbazole derivatives through ortho-positioned linking models
Source: Royal Society of Chemistry journal article supplement (doi:10.1039/d2nj02440c), 2022-01-01
Supplement: d2nj02440c1.pdf [file d2nj02440c1.pdf]

Supporting information for:

## Synthesis and Excited State Modulation of Organic Blue light Emitters Based on 2,4,6-Triphenyl-1,3,5-triazine and Carbazole Derivatives through ortho-Positioned Linking Models

Xiong Li <sup>1</sup>, Lifeng Zheng <sup>2</sup>, Wei Tang <sup>1</sup>, Shanghui Ye <sup>1</sup>, Jing Ma <sup>2</sup>, Hongji Jiang <sup>□ 1</sup>

<sup>1</sup> State Key Laboratory of Organic Electronics and Information Displays and Jiangsu Key Laboratory for Biosensors, Jiangsu National Synergetic Innovation Center for Advanced Materials, Institute of Advanced Materials, Nanjing University of Posts and Telecommunications, Nanjing

<sup>2</sup> Key Laboratory of Mesoscopic Chemistry of MOE, Jiangsu Key Laboratory of Advanced Organic Materials, School of Chemistry and Chemical Engineering, Nanjing University, Nanjing

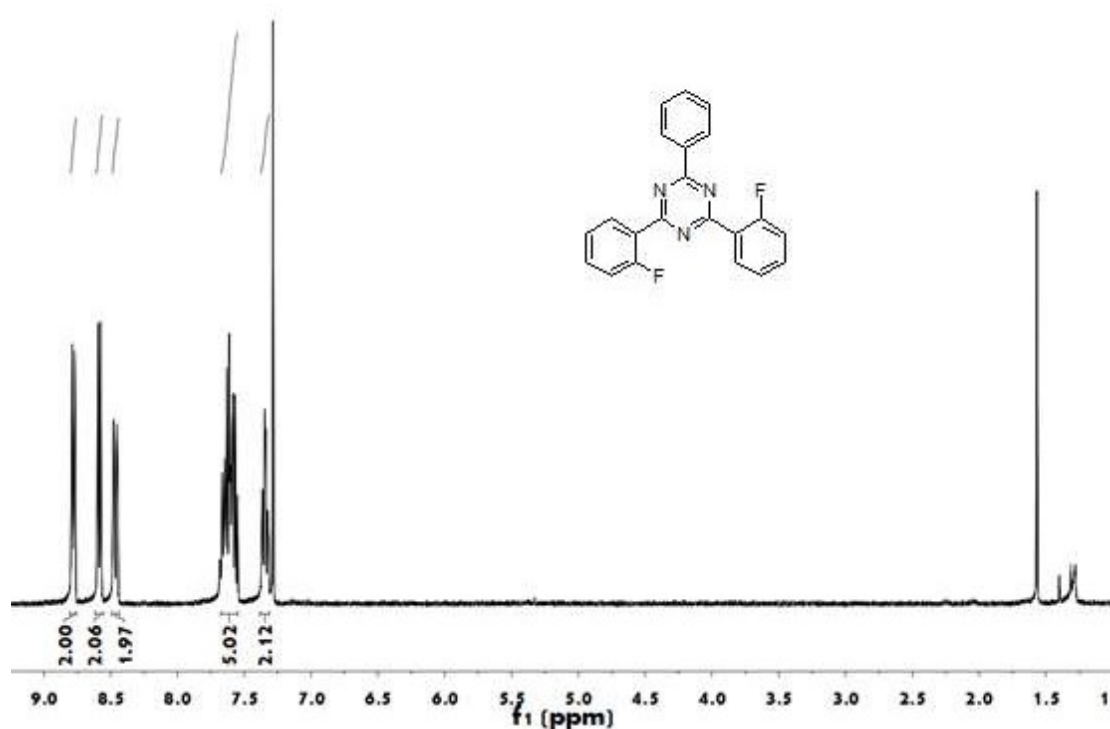

**Figure S1.** The <sup>1</sup>H-NMR (CDCl<sub>3</sub>, 400 MHz, ppm) shift spectra of compound 2,4-bis (4-fluorophenyl) -6-phenyl-1,3,5-triazine

<sup>□</sup> Corresponding author. E-mail: iamhjiang@njupt.edu.cn

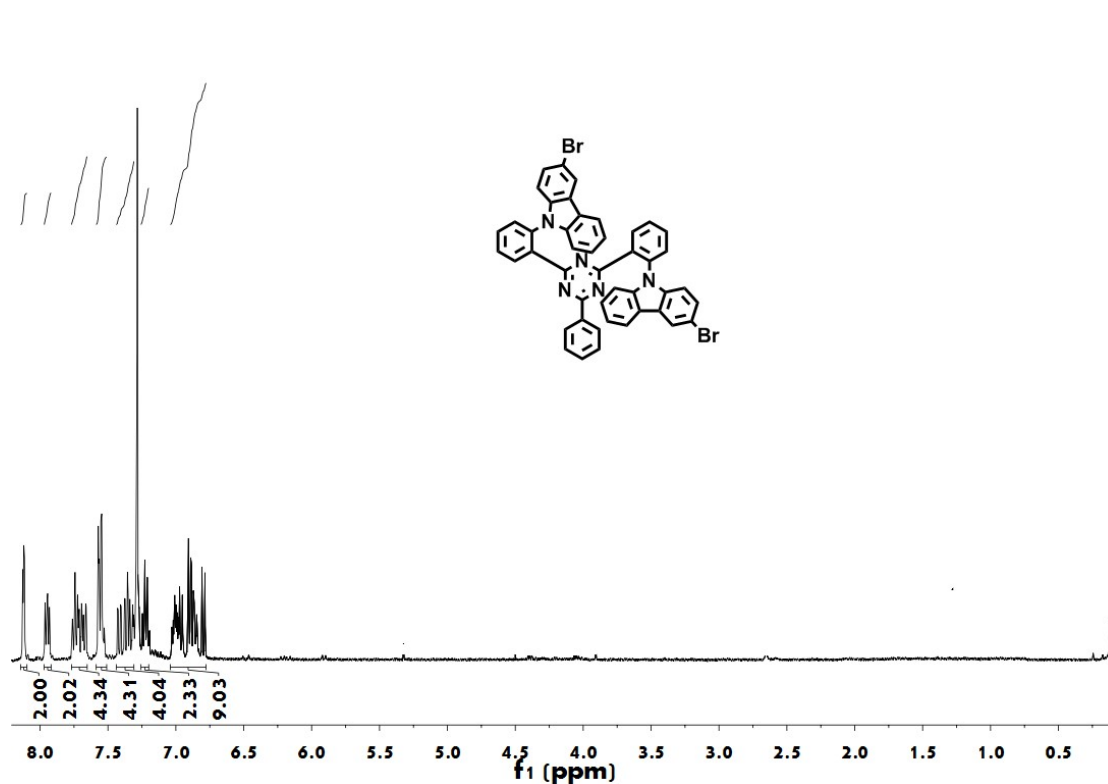

**Figure S2.** The  $^1\text{H-NMR}$  ( $\text{CDCl}_3$ , 400 MHz, ppm) shift spectra of emitter 9,9'-((6-phenyl-1,3,5-triazine-2,4-diyl) bis(2,1-phenylene)) bis(3-bromo-9H-carbazole)

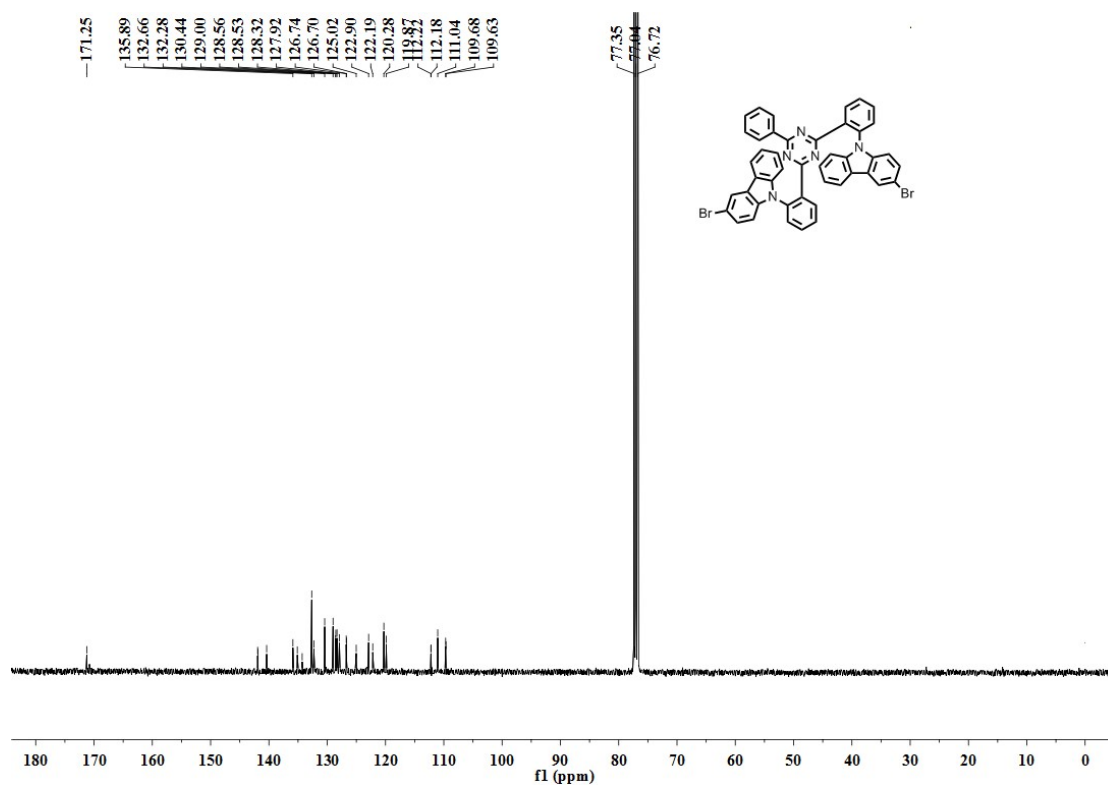

**Figure S3.** The  $^{13}\text{C-NMR}$  ( $\text{CDCl}_3$ , 100 MHz, ppm) shift spectra of emitter 9,9'-((6-phenyl-1,3,5-triazine-2,4-diyl) bis(2,1-phenylene)) bis(3-bromo-9H-carbazole)

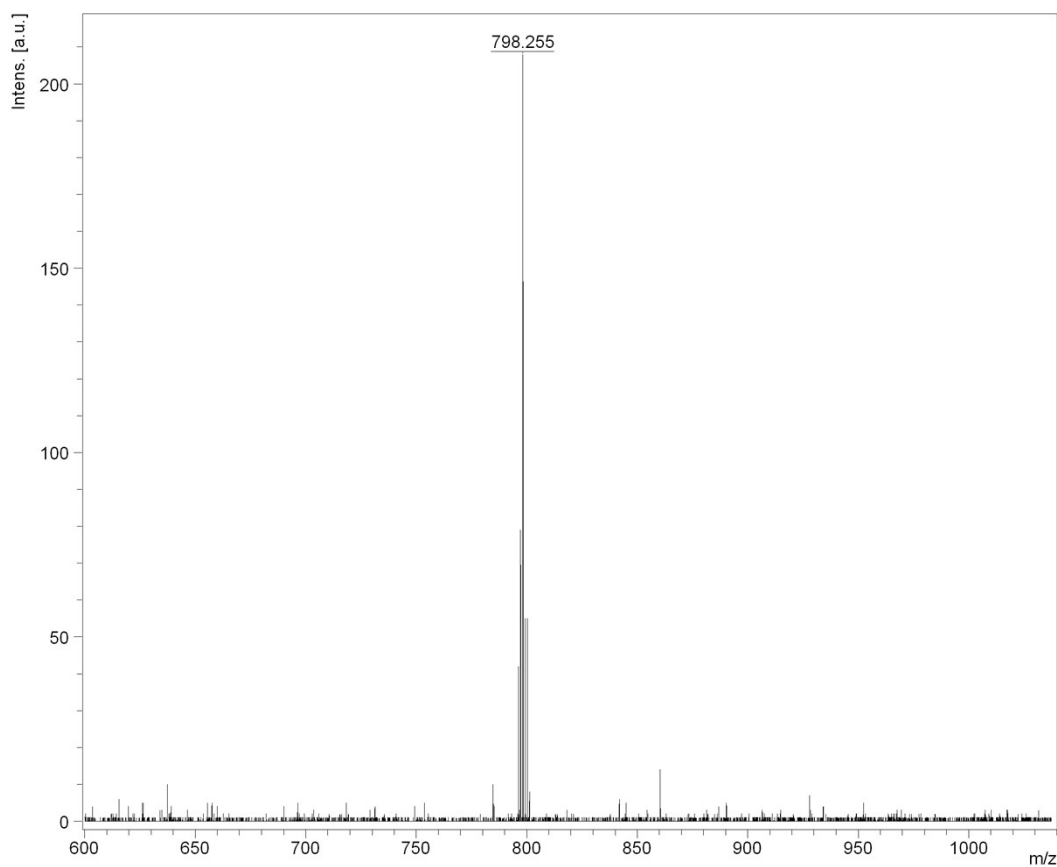

**Figure S4.** The MALDI-TOF spectra of emitter 9,9'-((6-phenyl-1,3,5-triazine-2,4-diyl) bis(2,1-phenylene)) bis(3-bromo-9H-carbazole)

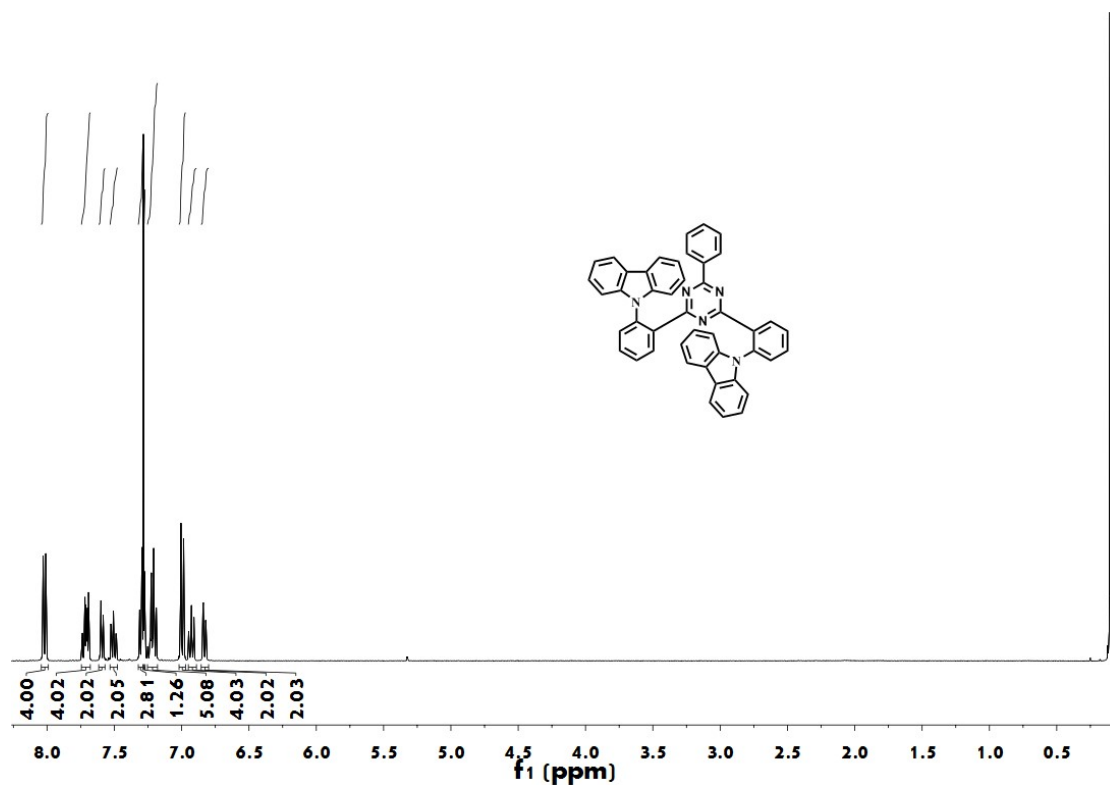

**Figure S5.** The <sup>1</sup>H-NMR (CDCl<sub>3</sub>, 400 MHz, ppm) shift spectra of emitter 9,9'-((6-phenyl-1,3,5-

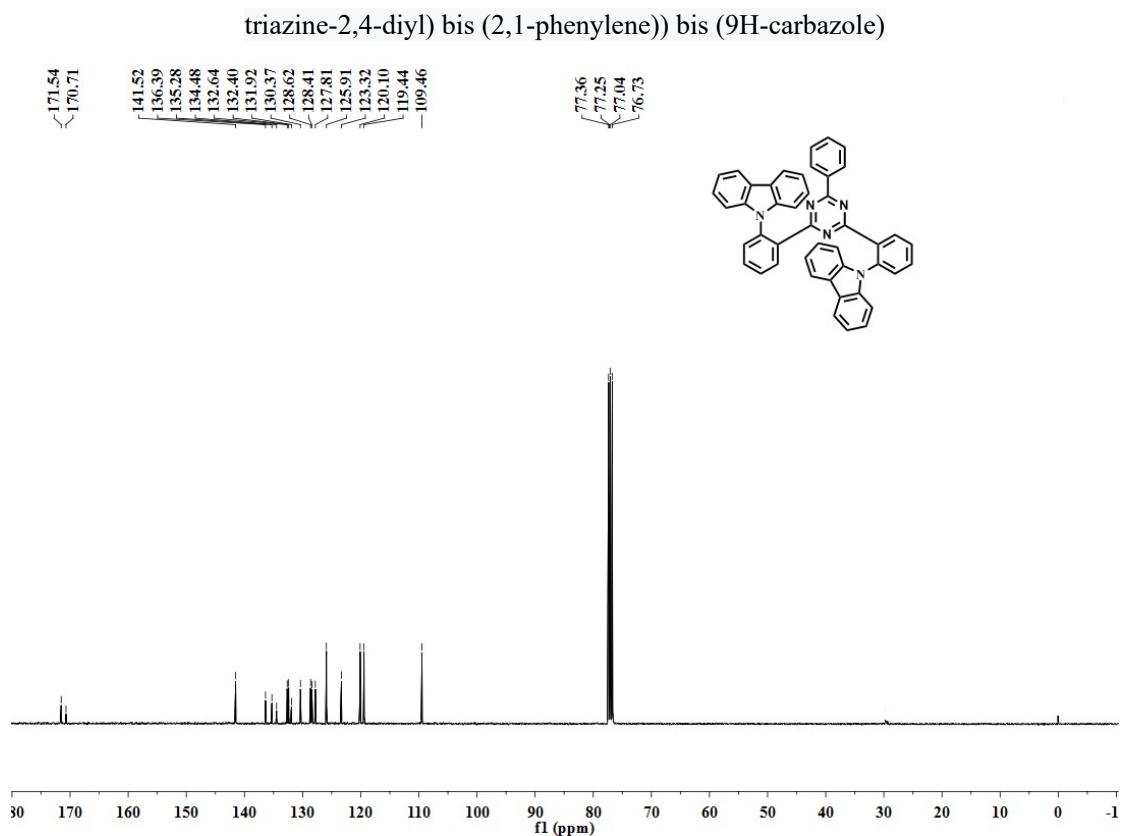

**Figure S6.** The  $^{13}\text{C}$ -NMR ( $\text{CDCl}_3$ , 100 MHz, ppm) shift spectra of emitter 9,9'-((6-phenyl-1,3,5-triazine-2,4-diyl) bis (2,1-phenylene)) bis (9H-carbazole)

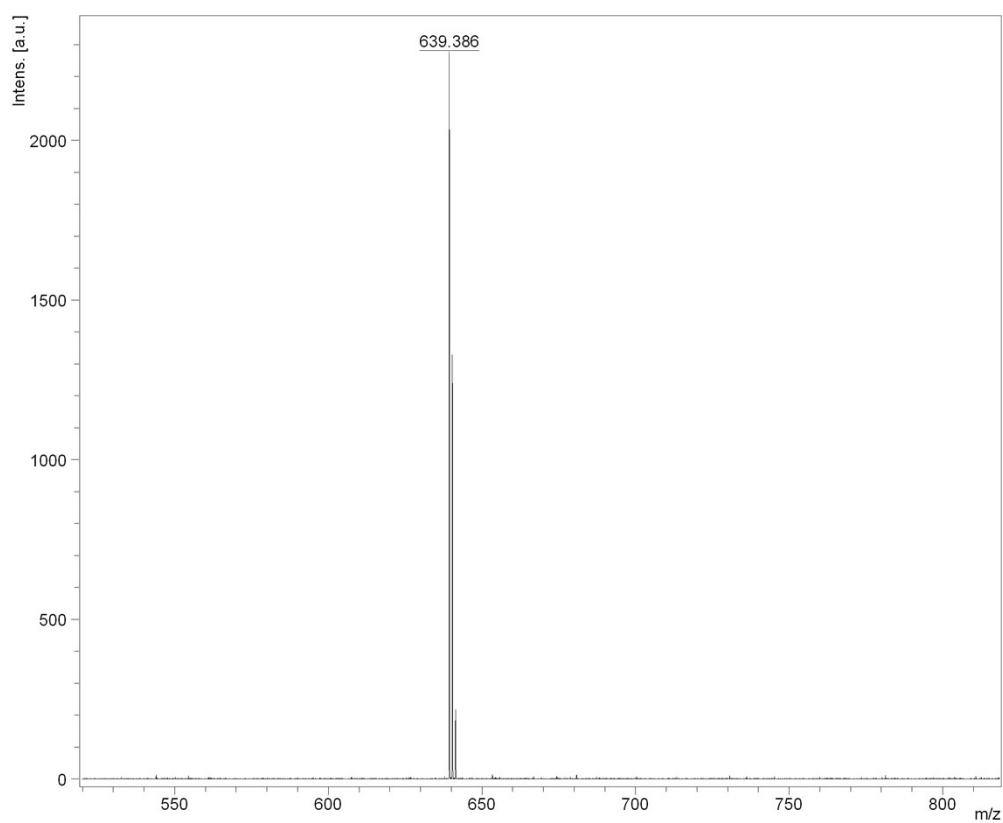

**Figure S7.** The MALDI-TOF spectra of emitter 9,9'-((6-phenyl-1,3,5-triazine-2,4-diyl) bis (2,1-

phenylene)) bis (9H-carbazole)

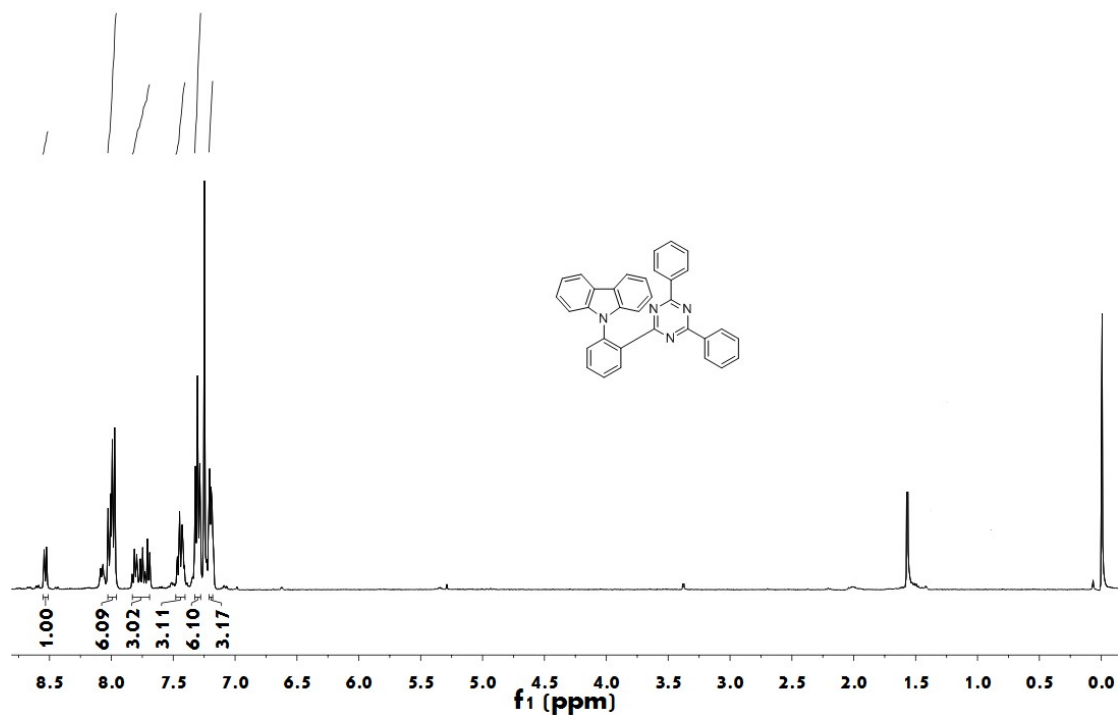

Figure S8. The  $^1\text{H}$ -NMR ( $\text{CDCl}_3$ , 400 MHz, ppm) shift spectra of emitter 9- (2- (4,6-diphenyl-1,3,5-triazin-2-yl) phenyl) -9H-carbazole

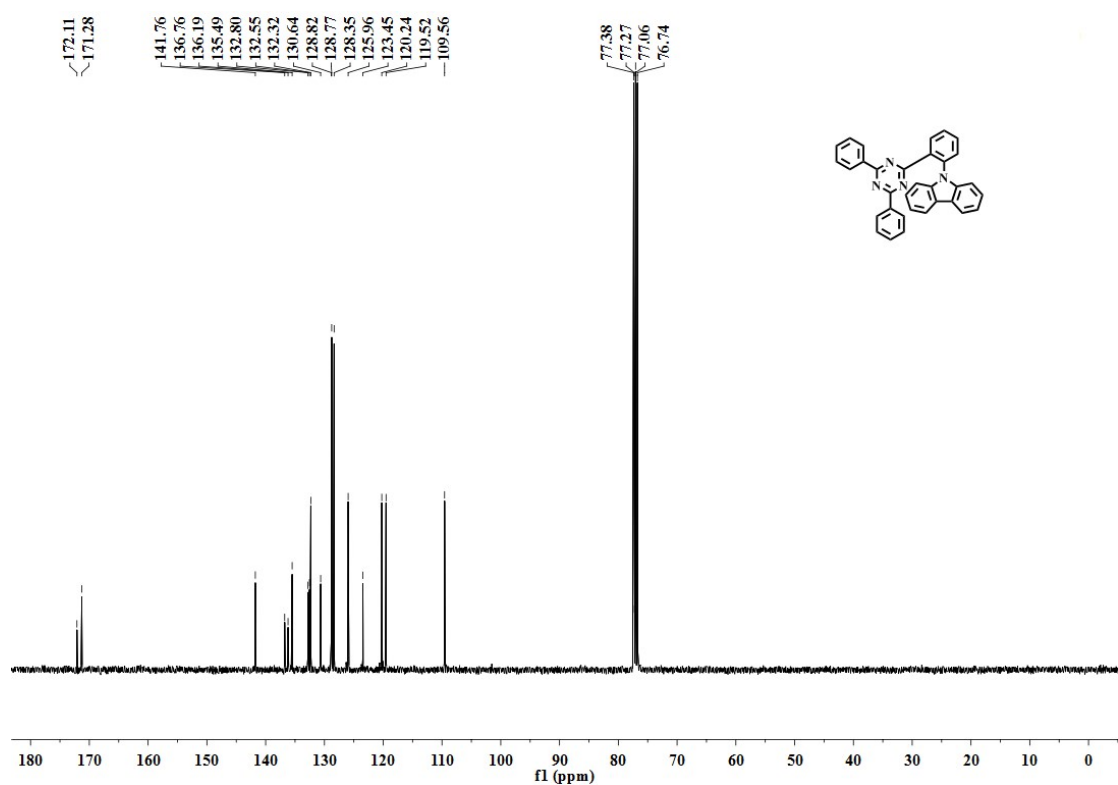

Figure S9. The  $^{13}\text{C}$ -NMR ( $\text{CDCl}_3$ , 100 MHz, ppm) shift spectra of emitter 9- (2- (4,6-diphenyl-

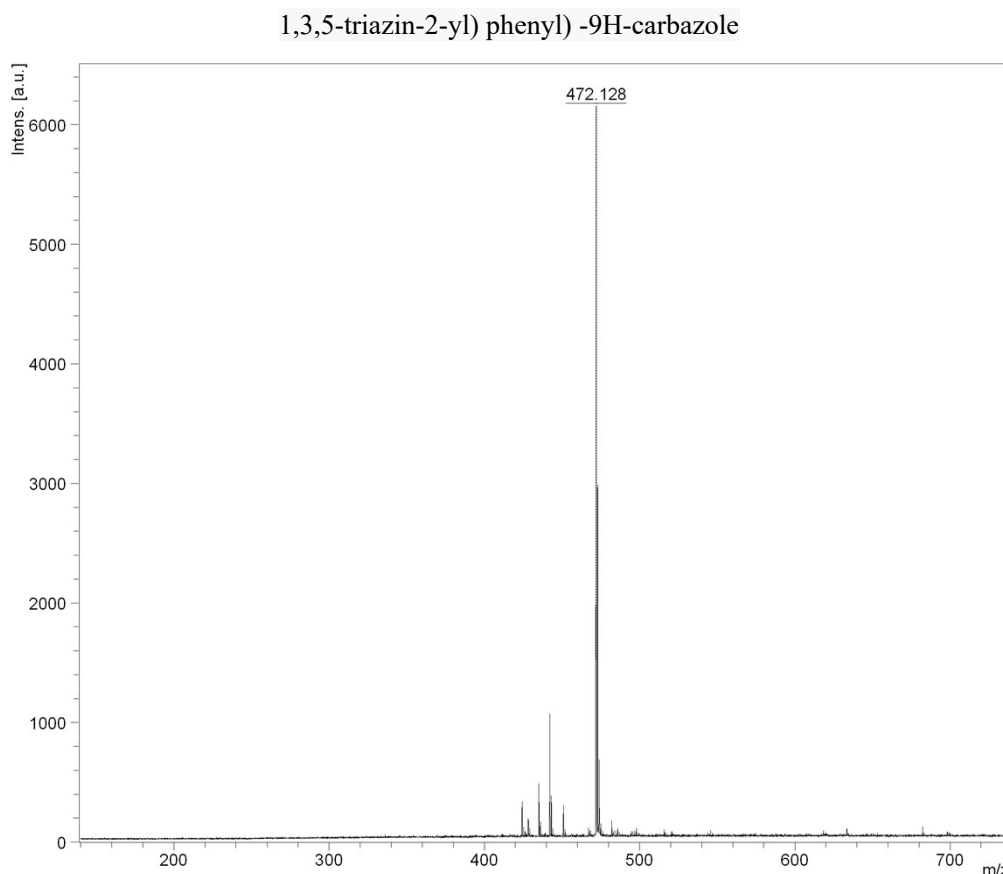

**Figure S10.** The MALDI-TOF spectra of emitter 9-(2-(4,6-diphenyl-1,3,5-triazin-2-yl) phenyl) -9H-carbazole

## Synthesis

**2-- (2-fluorophenyl)-4,6-diphenyl-1,3,5-triazine (OSTrPhF)** <sup>[24]</sup>: 2-chloro-4,6-diphenyl-1,3,5-triazine (2.67 g, 10 mmol), 2-fluorophenylboronic acid (2.1 g, 15 mmol), Pd(PPh<sub>3</sub>)<sub>4</sub> (420 mg, 0.6 mmol), tetrabutylammonium bromide (1.6g, 5 mmol), potassium carbonate aqueous solution (20 ml, 2 mol/L, deoxygenation) and toluene (60 ml, deoxygenation) were added to the double-necked flask. It was drained three times, protected from light at 90 °C for 24 hours in an atmosphere of N<sub>2</sub>. After the reaction solution was cooled to room temperature, the resulting mixture was extracted with dichloromethane and water for 3 times, filtered, and concentrated under reduced pressure. The residue solid was purified by silica gel column chromatograph (petroleum ether: dichloromethane=10:1 in volume) to obtain 2.78g white solid in a yield of 85%. <sup>1</sup>H NMR (400 MHz, CDCl<sub>3</sub>) δ 8.79-8.71 (m, 4H), 8.47 (td, 1H), 7.62-7.52 (m, 7H), 7.34 (ddd, 1H), 7.25 (dt, 1H).

**9- (2- (4,6-diphenyl-1,3,5-triazin-2-yl) phenyl) -9H-carbazole (OSTrPhCz)**  
<sup>[22]</sup>: carbazole (1.5 g, 6 mmol), Cs<sub>2</sub>CO<sub>3</sub> (2.1 g, 4 mmol) and compound **OSTrPhF** (1.35 g, 4 mmol) were dissolved in 50 mL N,N-dimethylformamide, poured into reaction flask, and stirred at 160 °C for 12 hours. After the reaction solution was cooled to room temperature, the resulting mixture was extracted with dichloromethane and water for 3 times, filtered, and concentrated under reduced pressure. The residue solid was purified by silica gel column chromatograph (petroleum ether: dichloromethane = 5:1 in volume) to obtain 1.13g white solid in a yield of 59.7%. <sup>1</sup>H NMR (400 MHz, CDCl<sub>3</sub>) δ 8.53 (d, 1H), 8.00 (dd, 7.9 Hz, 6H), 7.83 – 7.69 (m, 3H), 7.47 – 7.39 (m, 3H), 7.30 (t, 6H), 7.21 – 7.17 (m, 3H). <sup>13</sup>C NMR (400 MHz, CDCl<sub>3</sub>) δ 172.11, 171.28, 141.76, 136.76, 136.19, 135.49, 132.80, 132.55, 132.32, 130.64, 128.82, 128.77, 128.35, 125.96, 123.45, 120.24, 119.52, 109.56. m/z: theoretical: 474.567, experimental: 472.168.

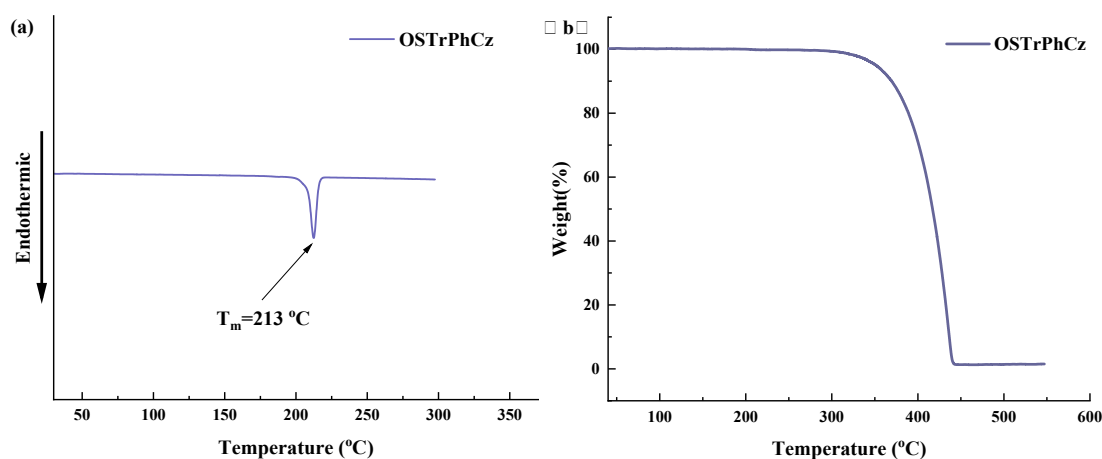

**Figure S11.** The DSC (a) and TGA (b) curves of emitter **OStrPhCz** in solid powder state

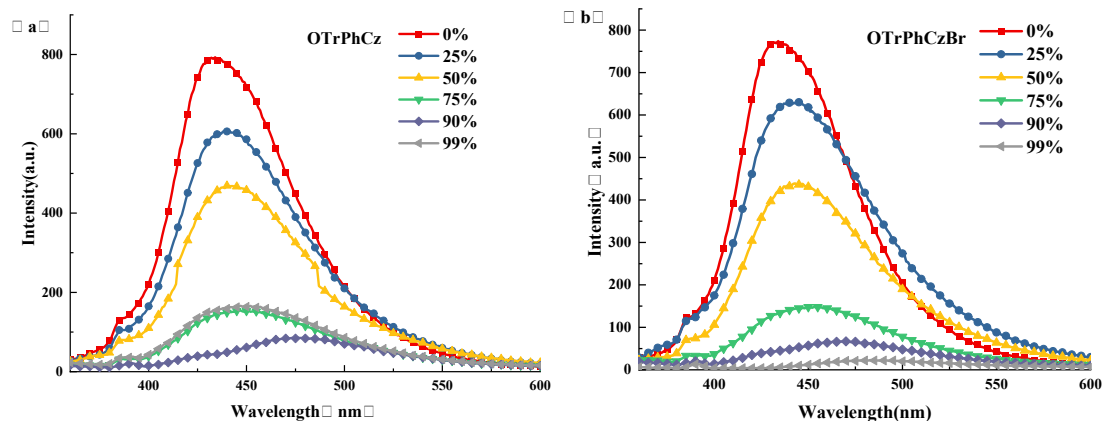

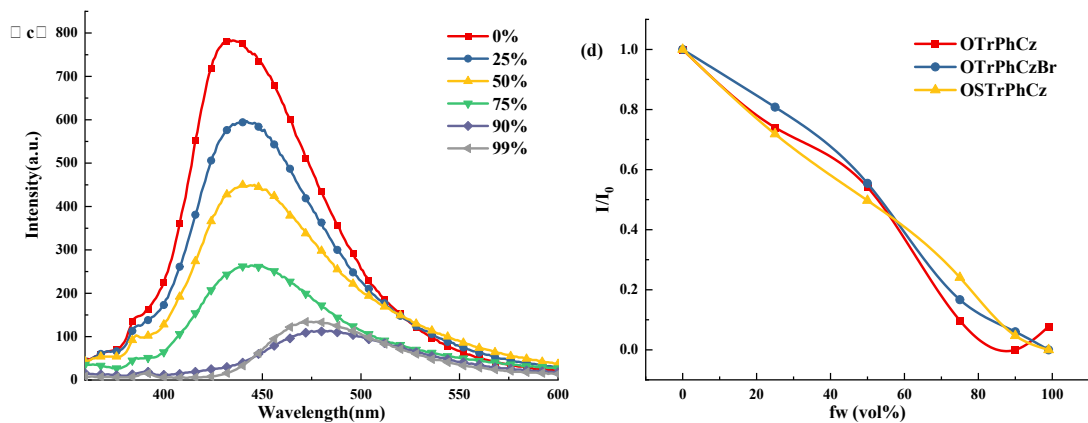

**Figure S12.** Photoluminescence emission spectra of emitters **OTrPhCz** (a), **OTrPhCzBr** (b) and **OTrPhCz** (c) in a mixed solution of tetrahydrofuran and water with different water contents ( $F_w$ ), (d) Emission intensity trend graph with water content ( $I/I_0$ : relative emission intensity)

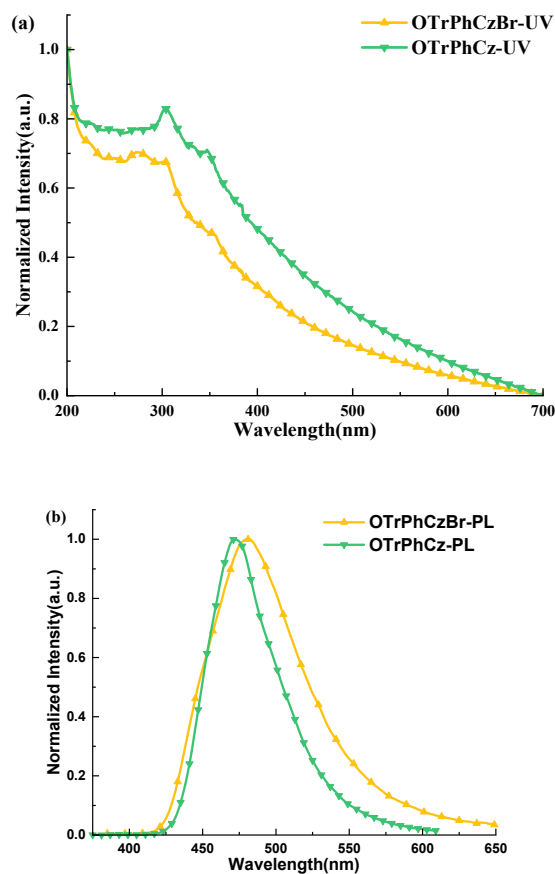



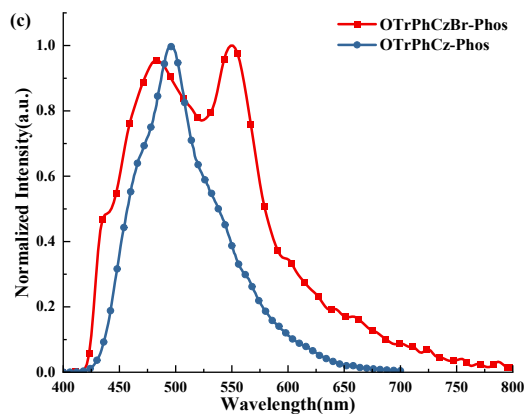

**Figure S13.** The normalized UV-vis absorption spectra (a), PL spectra (b) and phosphorescence spectra (c) of emitters **OTrPhCzBr** and **OTrPhCz** in the powder states

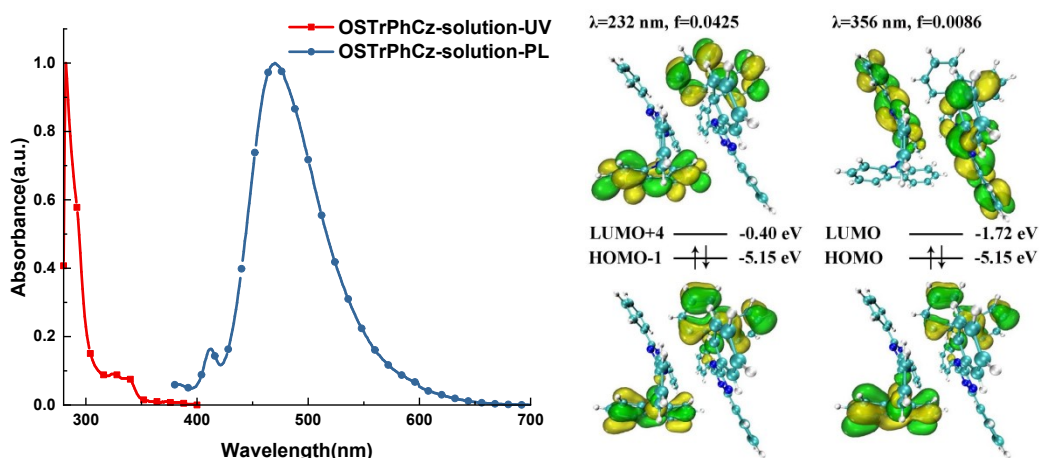

**Figure S14.** The normalized UV-vis absorption and PL emission spectra (left) of emitter **OTrPhCz** in toluene ( $10^{-5}$  mol/L) solution. Calculated orbital energy levels and transition illustrations (right) of **OTrPhCz** by TDDFT at the B3LYP/6-31G(d) level (isovalue=0.02).

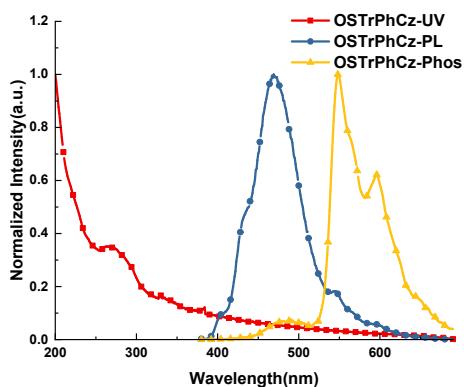

**Figure S15.** The normalized UV-vis absorption spectra, PL emission spectra and phosphorescence spectra of emitters **OTrPhCz** in the powder states

In order to more clearly understand the electron excitation caused by the orbital

transition, the scheme of the specific orbital transition of the three emitters were shown here, mainly including the orbital transition illustrations corresponding to the lowest five excitations and the maximum excitation, as shown in Figures S16- S18. It can be seen that only the emitter **OTrPhCz** occurs  $\pi$ - $\pi^*$  orbital transition at a low excitation wavelength, and the other cases are charge transfer transitions.

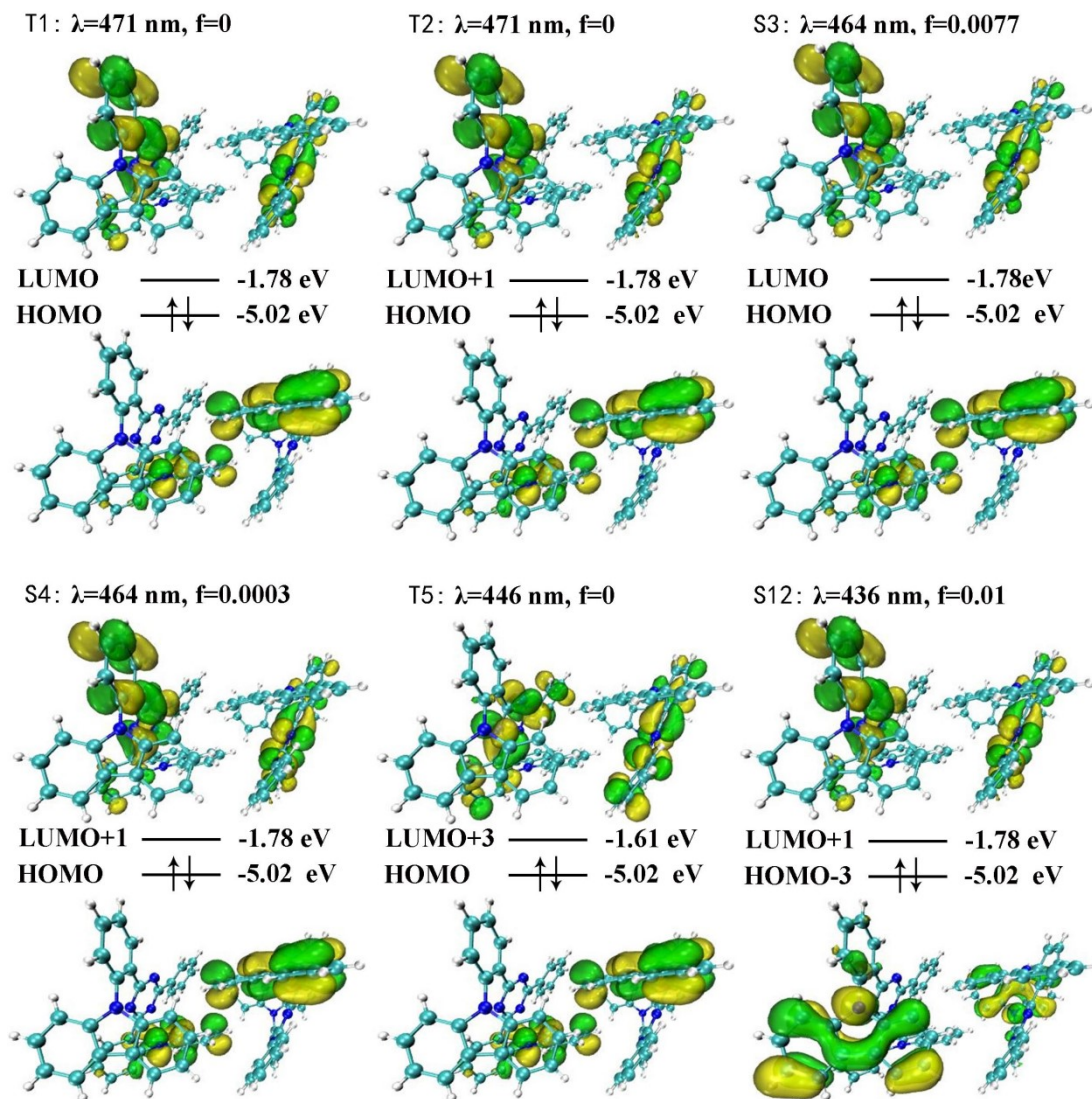

**Figure S16.** Calculated certain orbital energy levels and transition illustrations of **OTrPhCz** by TDDFT at the B3LYP/6-31G(d) level (isovalue=0.02).

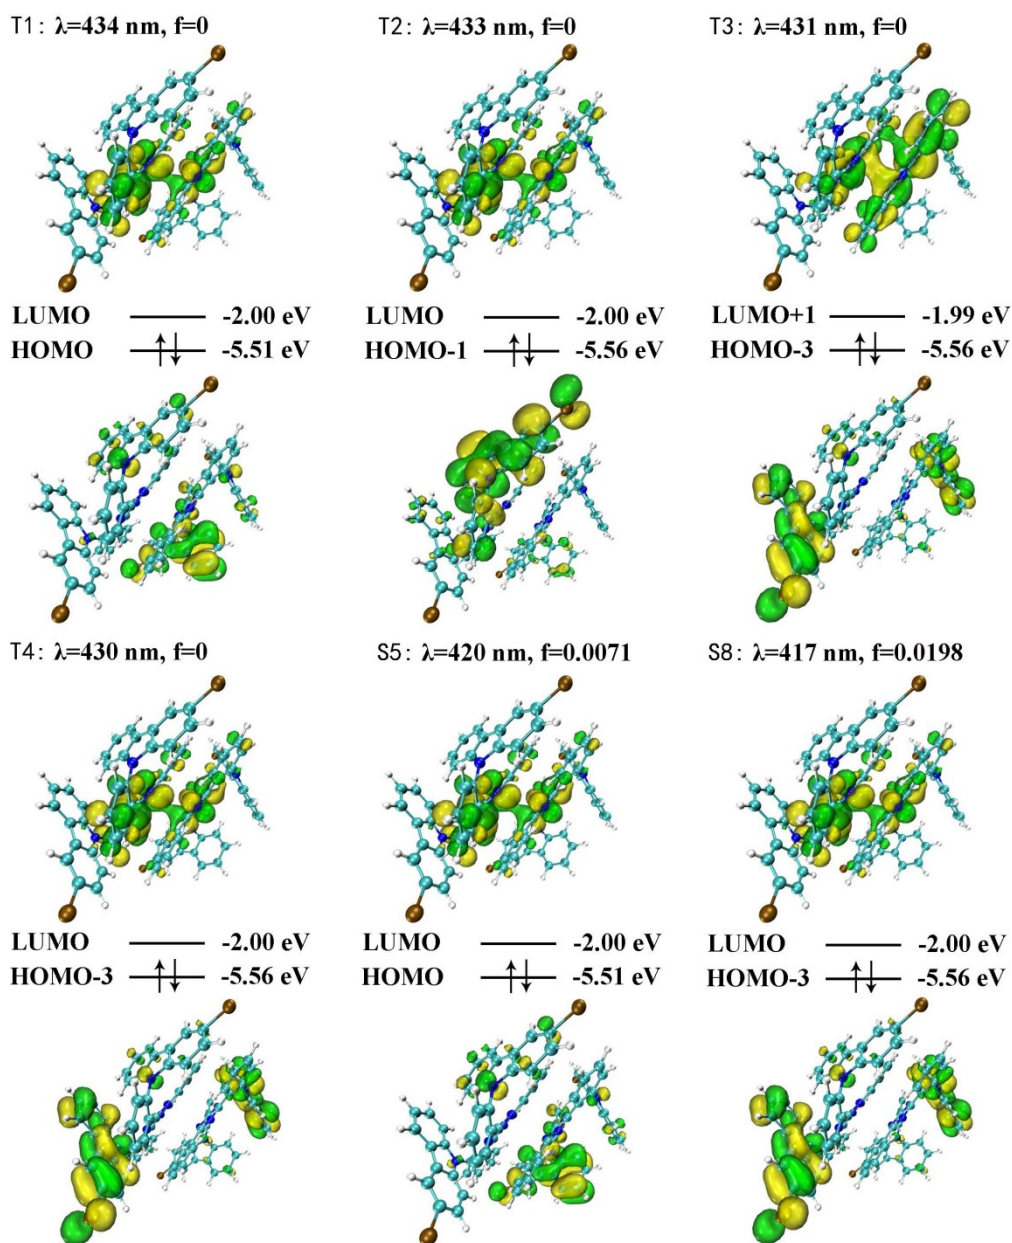

**Figure S17.** Calculated certain orbital energy levels and transition illustrations of **OTrPhCzBr** by

TDDFT at the B3LYP/6-31G(d) level (isovalue=0.02).



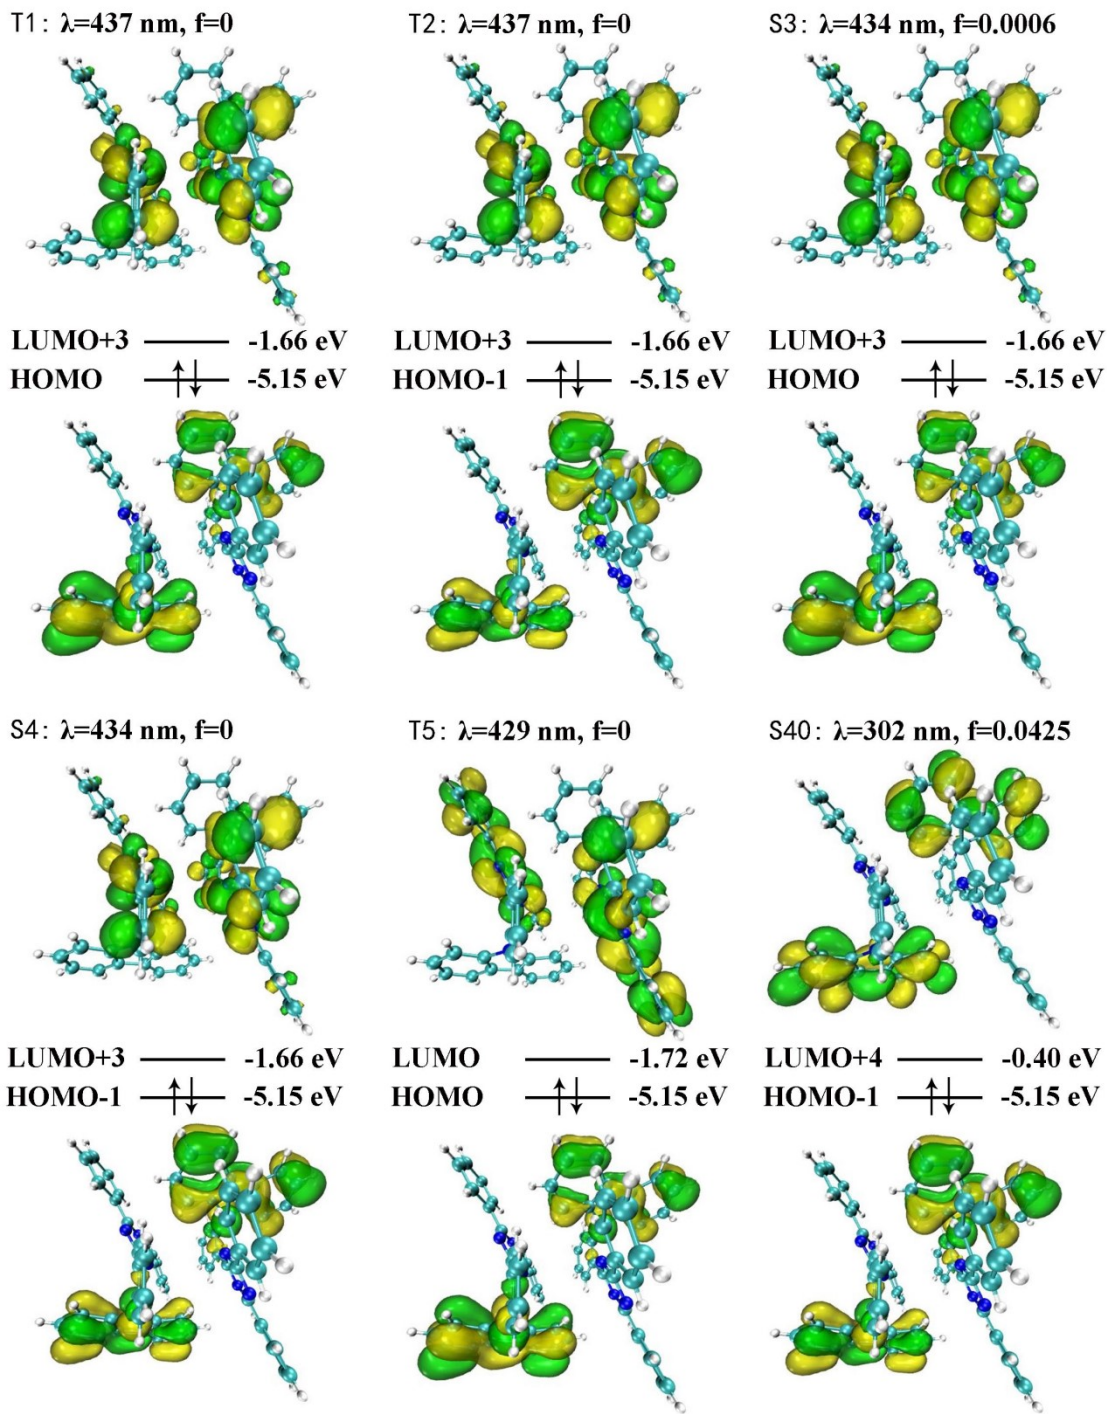

**Figure S18.** Calculated certain orbital energy levels and transition illustrations of **OSTrPhCz** by TDDFT at the B3LYP/6-31G(d) level (isovalue=0.02).

The DFT calculated phosphorescence emission spectra of **OTrPhCzBr**, **OTrPhCz**, and **OSTrPhCz** are given in Figure S19. They were calculated by TDDFT based on the optimized geometries of low-lying triplet ( $T_1$ ) excited state for emitters.

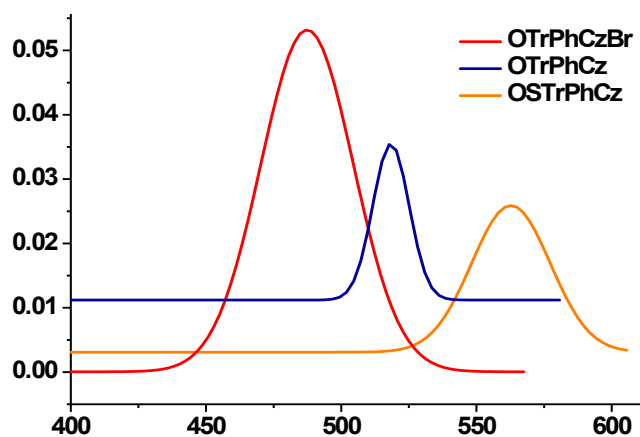

**Figure S19.** Calculated phosphorescence emission spectra of **OTrPhCzBr**, **OTrPhCz**, and **OTrPhCz** at the B3LYP/6-31G(d) level.

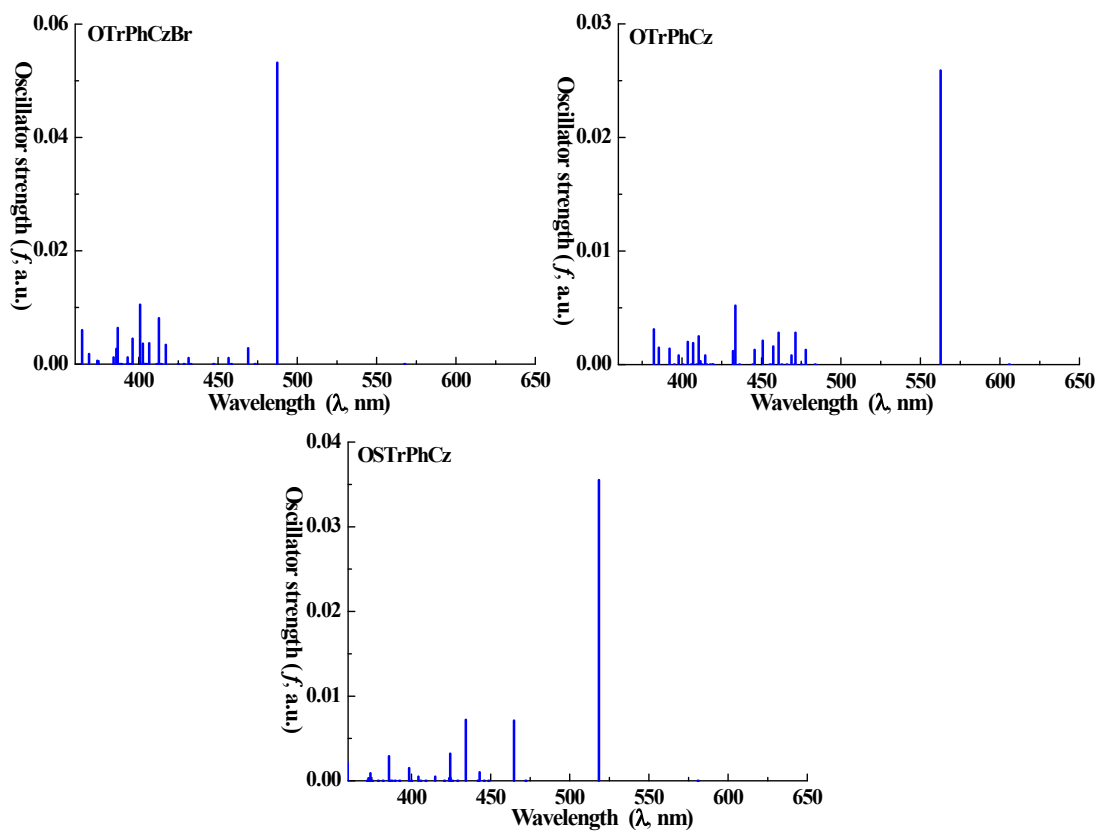

**Figure S20.** Calculated oscillator strength( $f$ ) - excitation wavelength( $\lambda$ ) chart based  $T_1$  excited states of **OTrPhCzBr**, **OTrPhCz**, and **OTrPhCz** at the B3LYP/6-31G(d) level.

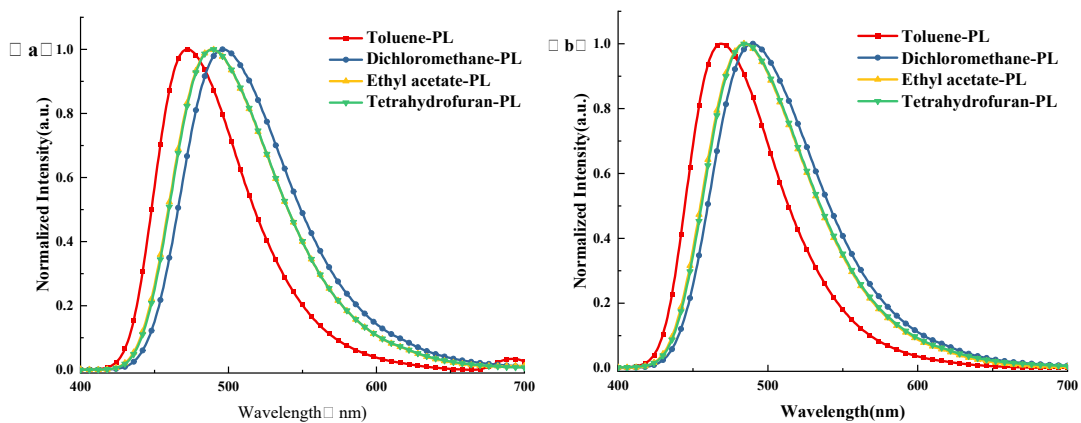

**Figure S21.** The normalized PL emission spectra of emitters **OTrPhCz** (a) and **OTrPhCzBr** (b) in different polar solvents at a concentration of  $10^{-5}$  mol/L

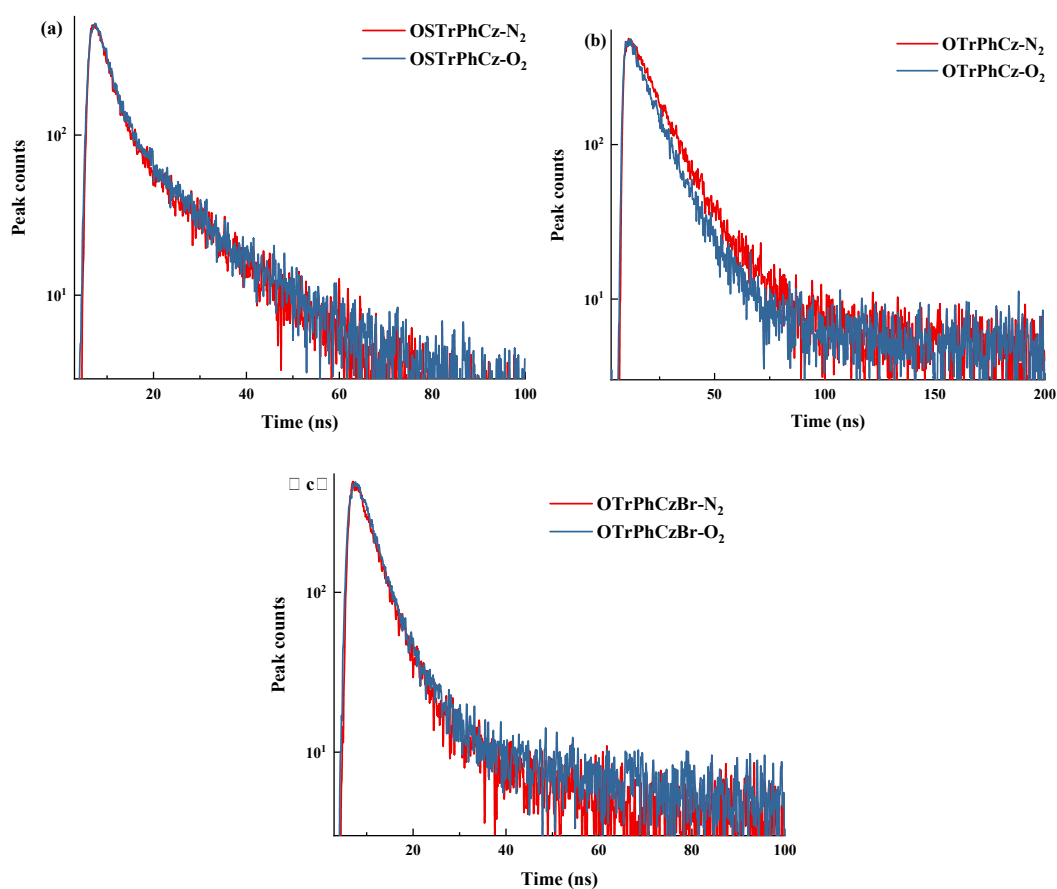

**Figure S22.** Transient PL decay curves of emitters **OTrPhCz** (a), **OTrPhCz** (b) and **OTrPhCzBr** (c) solid powder under aerobic and anaerobic conditions at room temperature

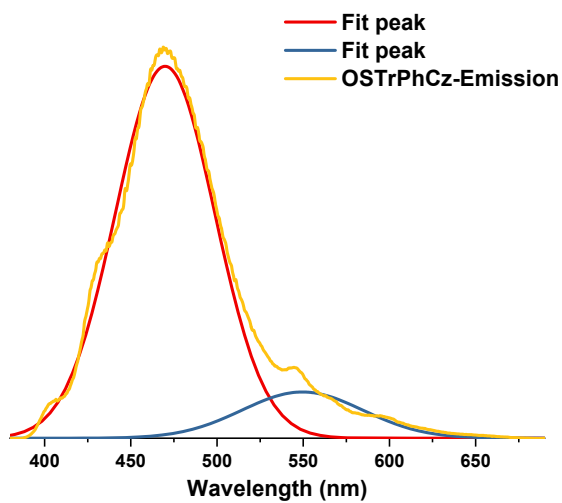

**Figure S23.** The peak-splitting diagram of **OTrPhCz** PL spectra in solid powder state

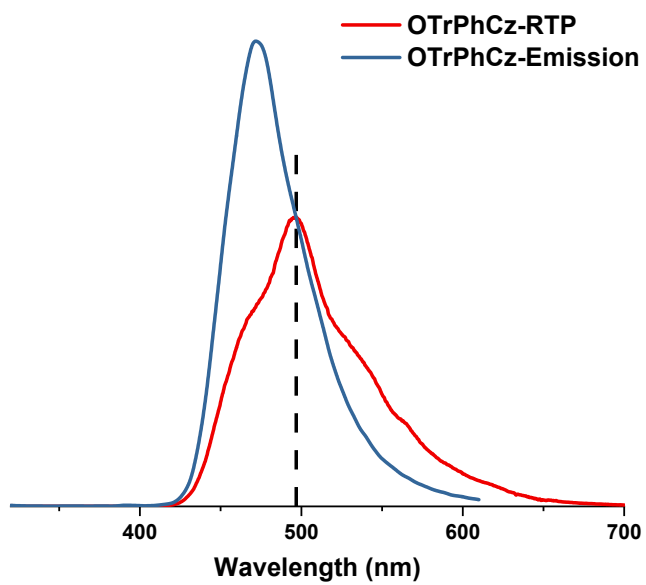

**Figure S24.** The peak-splitting diagram of **OTrPhCz** PL spectra in solid powder state

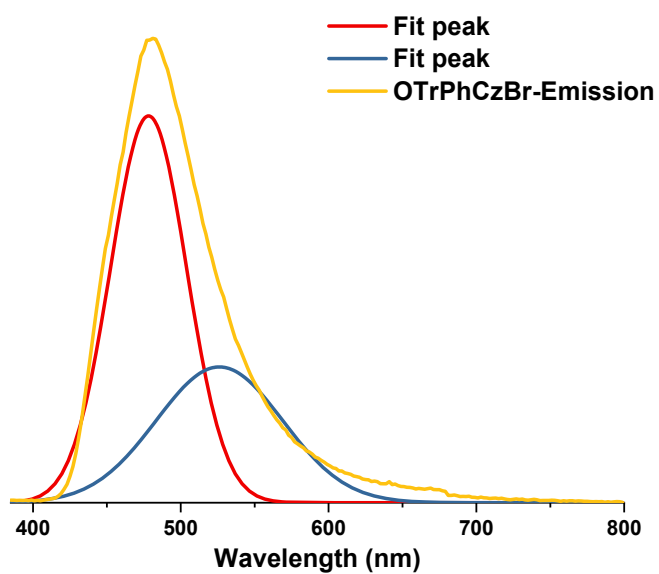

**Figure S25.** The peak-splitting diagram of **OTrPhCzBr** PL spectra in solid powder state

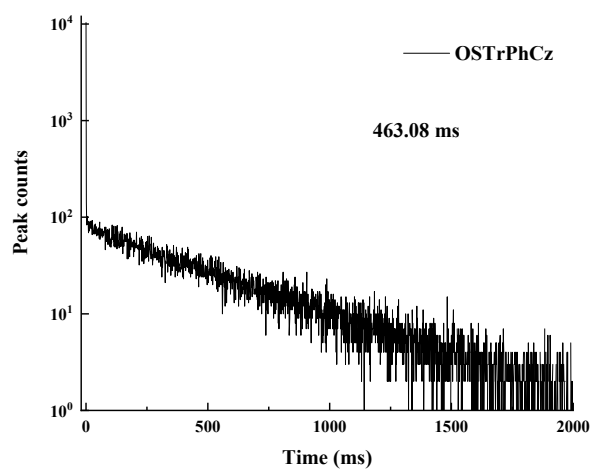

**Figure S26.** Photo-attenuation curves of emitters **OTrPhCz** in the solid powder state



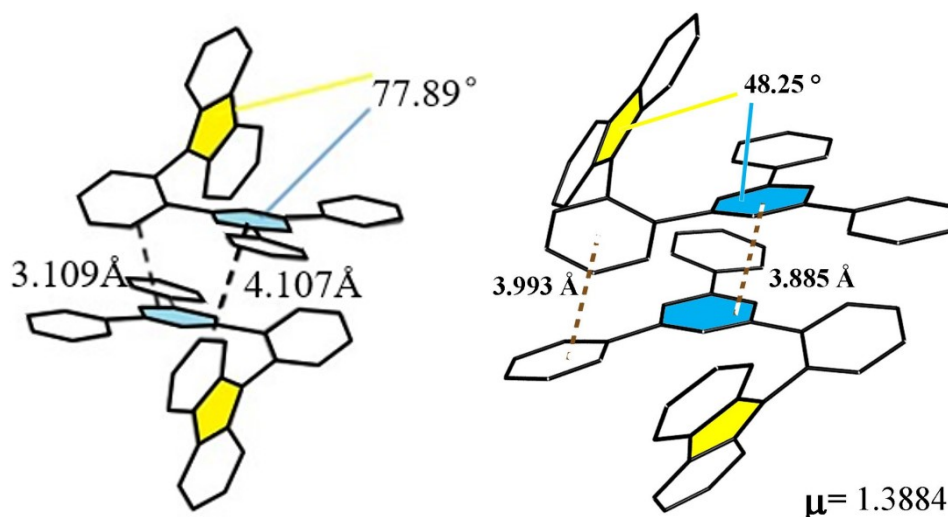

**Figure S27.** Crystal structure (left) and optimized geometry (right) of the emitter **OTrPhCz**.  $\mu$  represents total dipole moment of the molecule, which is 1.3884, so **OTrPhCz** has maximum phosphorescence emission intensity among three emitters

**Table S1** Summary of PL lifetime data of emitters **OTrPhCz**, **OTrPhCzBr** and **OTrPhCz** in solid powder states under aerobic and anaerobic conditions at room temperature

|                  | $\tau_1/\tau_2$ (N <sub>2</sub> ) | $\tau_1/\tau_2$ (O <sub>2</sub> ) |
|------------------|-----------------------------------|-----------------------------------|
| <b>OTrPhCz</b>   | 3.02/16.53 ns                     | 3.18/15.47 ns                     |
| <b>OTrPhCz</b>   | 10.99/29.87 ns                    | 13.92 ns                          |
| <b>OTrPhCzBr</b> | 4.28/21.25 ns                     | 0.36/4.65 ns                      |

**Table S2.** The single crystal data of emitters **OTrPhCz**, **OTrPhCzBr** and **OTrPhCz**

| Identification code   | <b>OTrPhCz</b>                                 | <b>OTrPhCzBr</b>                                               | <b>OTrPhCz</b>                                 |
|-----------------------|------------------------------------------------|----------------------------------------------------------------|------------------------------------------------|
| Empirical formula     | C <sub>45</sub> H <sub>29</sub> N <sub>5</sub> | C <sub>45</sub> H <sub>27</sub> Br <sub>2</sub> N <sub>5</sub> | C <sub>33</sub> H <sub>22</sub> N <sub>4</sub> |
| Formula weight        | 639.73                                         | 797.53                                                         | 473.48                                         |
| Temperature/K         | 296.53                                         | 105.13                                                         | 294.5                                          |
| Crystal system        | monoclinic                                     | monoclinic                                                     | triclinic                                      |
| Space group           | P2 <sub>1</sub> /n                             | P2 <sub>1</sub> /n                                             | P-1                                            |
| a/Å                   | 12.694(7)                                      | 9.062(10)                                                      | 9.9328(18)                                     |
| b/Å                   | 13.142(7)                                      | 16.892(2)                                                      | 11.392(2)                                      |
| c/Å                   | 20.329(9)                                      | 22.899(3)                                                      | 12.329(2)                                      |
| $\alpha$ /°           | 90                                             | 90                                                             | 96.567(5)                                      |
| $\beta$ /°            | 105.108(13)                                    | 94.139(3)                                                      | 112.391(4)                                     |
| $\gamma$ /°           | 90                                             | 90                                                             | 101.087(4)                                     |
| Volume/Å <sup>3</sup> | 3274(3)                                        | 3496.1(7)                                                      | 1239.4(4)                                      |
| Z                     | 4                                              | 4                                                              | 2                                              |

|                                               |                                                              |                                                             |                                                              |
|-----------------------------------------------|--------------------------------------------------------------|-------------------------------------------------------------|--------------------------------------------------------------|
| $\rho$ calcg/cm <sup>3</sup>                  | 1.298                                                        | 1.515                                                       | 1.272                                                        |
| $\mu$ /mm <sup>-1</sup>                       | 0.077                                                        | 2.361                                                       | 0.076                                                        |
| F(000)                                        | 1336.0                                                       | 1608.0                                                      | 496.0                                                        |
| Radiation                                     | MoK $\alpha$ ( $\lambda = 0.71073$ )                         | MoK $\alpha$ ( $\lambda = 0.71073$ )                        | MoK $\alpha$ ( $\lambda = 0.71073$ )                         |
| $2\Theta$ range for data collection/ $^\circ$ | 4.544 to 54.968                                              | 4.306 to 52.616                                             | 4.534 to 56.564                                              |
| Index ranges                                  | $-16 \leq h \leq 16, -17 \leq k \leq 16, -21 \leq l \leq 26$ | $-10 \leq h \leq 11, -21 \leq k \leq 9, -28 \leq l \leq 28$ | $-12 \leq h \leq 13, -15 \leq k \leq 15, -16 \leq l \leq 12$ |
| Reflections collected                         | 26932                                                        | 20242                                                       | 10258                                                        |
| Independent reflections                       | 7509 [Rint = 0.0362, Rsigma = 0.0369]                        | 7062 [Rint = 0.0499, Rsigma = 0.0579]                       | 6014 [Rint = 0.0366, Rsigma = 0.0661]                        |
| Data/restraints/parameters                    | 7509/0/451                                                   | 7062/0/488                                                  | 6014/0/334                                                   |
| Goodness-of-Fit on F <sup>2</sup>             | 1.035                                                        | 1.100                                                       | 1.021                                                        |
| Final R indexes [ $I \geq 2\sigma(I)$ ]       | R1 = 0.0517, wR2 = 0.1181                                    | R1 = 0.1093, wR2 = 0.2517                                   | R1 = 0.0752, wR2 = 0.1601                                    |
| Final R indexes [all data]                    | R1 = 0.0896, wR2 = 0.1387                                    | R1 = 0.1278, wR2 = 0.2593                                   | R1 = 0.1139, wR2 = 0.1779                                    |
| Largest diff. peak/hole / e $\text{\AA}^{-3}$ | 0.18/-0.22                                                   | 0.64/-0.94                                                  | 0.24/-0.24                                                   |

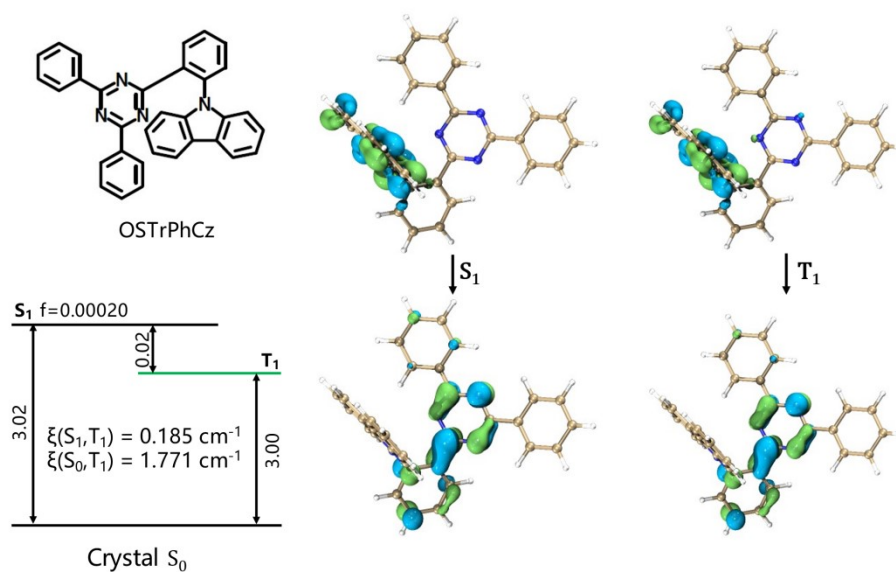

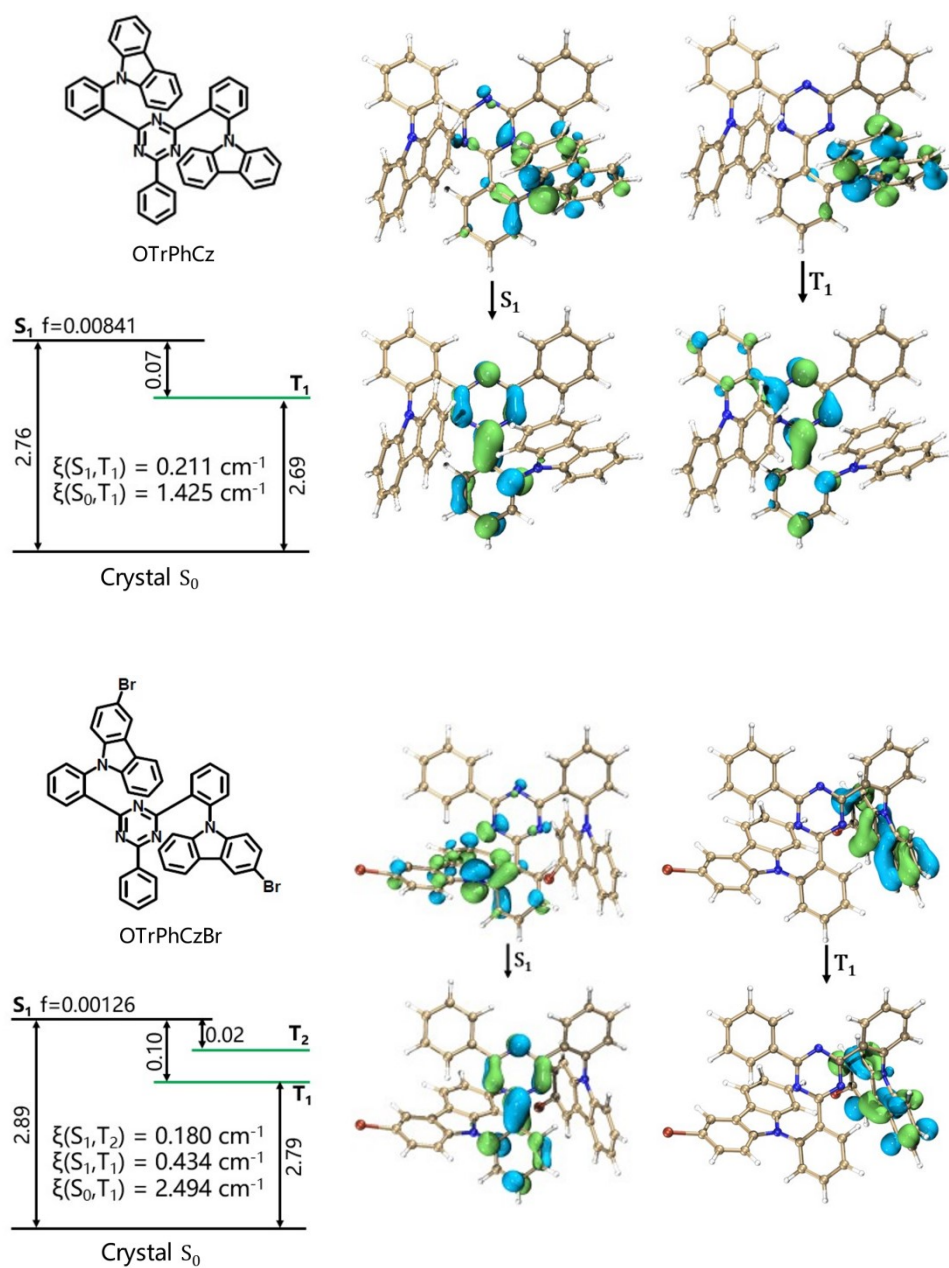

**Figure S28.** The calculated spin-orbit coupling constant, calculated energy diagram, and spin-orbital coupling ( $\xi$ ) in the crystalline phase of **OTrPhCz**, **OTrPhCzBr** and **OTrPhCz**.

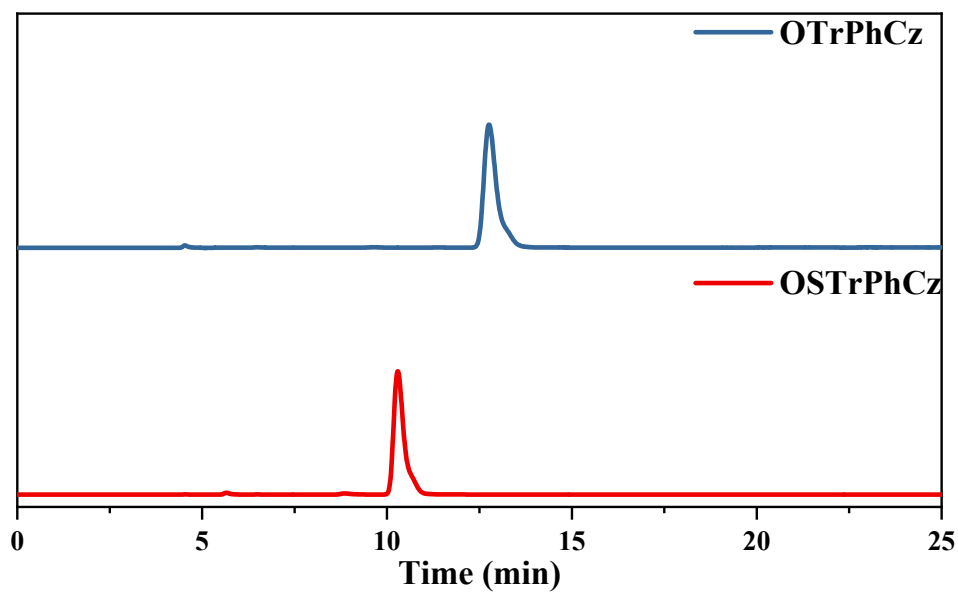

**Figure S29.** The HPLC spectra collected with acetonitrile as mobile phase at 0.8 mL/min and at 35 °C, which were monitored at 288 nm for **OTrPhCz** and 282 nm for **OTrPhCz**.

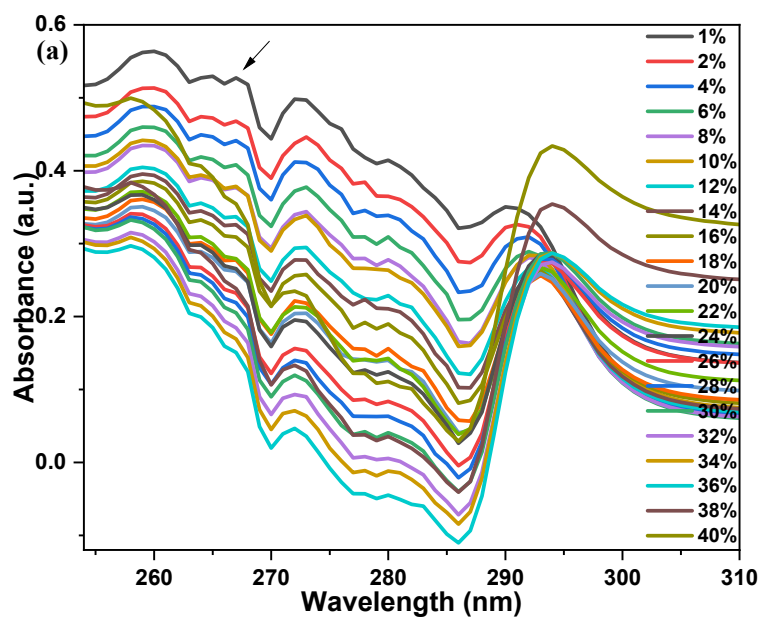

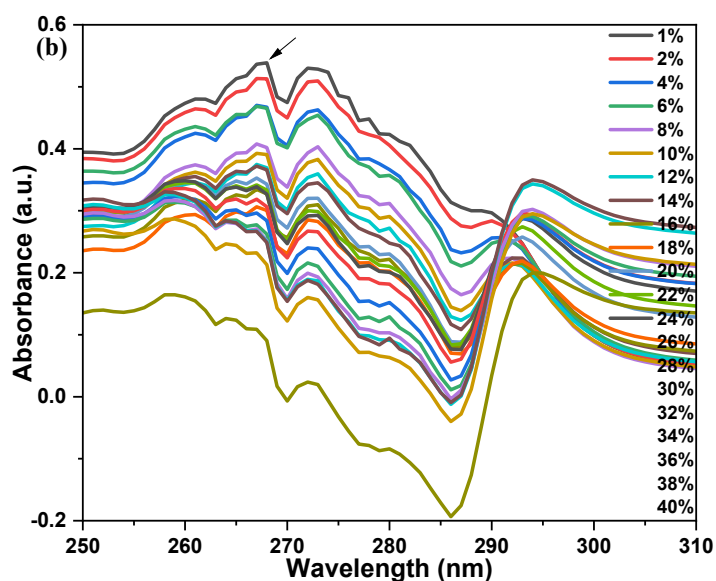

**Figure S30.** The UV-vis absorption spectra of **OTrPhCz(a)** and **OTrPhCz(b)** (10  $\mu$ M) measured in the mixture solvents of tetrahydrofuran and water with different water volumes

**Table S3.** Aggregation structures of **OTrPhCz**, **OTrPhCzBr** and **OTrPhCz** crystals investigated by Frenkel exciton theory through the nearest neighboring dimers. When the splitting energy ( $\Delta\varepsilon$ )  $>$  0, this pair of dimer belongs to H-aggregation (in red), and when  $\Delta\varepsilon <$  0, it is J-aggregation (in black).

| Compounds      | Dimer | $\alpha$ ( $^\circ$ ) | $\theta_1$ ( $^\circ$ ) | $\theta_2$ ( $^\circ$ ) | M (Debye)   | r ( $\text{\AA}$ ) | $\Delta\varepsilon$ (eV) |
|----------------|-------|-----------------------|-------------------------|-------------------------|-------------|--------------------|--------------------------|
|                | 4 0   | 0.006393171           | 63.65510274             | 63.65282152             | 0.143684098 | 22.78400787        | 8.92738E-07              |
|                | 4 1   | 0.009489505           | 77.85244466             | 77.84457896             | 0.143684098 | 27.11763783        | 1.12211E-06              |
|                | 4 2   | 0.006403858           | 63.65511491             | 63.6539265              | 0.143684098 | 11.39201041        | 7.1423E-06               |
|                | 4 3   | 0.009218502           | 87.89461605             | 87.88655113             | 0.143684098 | 17.71743338        | 4.62129E-06              |
|                | 4 5   | 0.009218502           | 110.9316359             | 110.9224406             | 0.143684098 | 12.32899146        | 8.50015E-06              |
|                | 4 6   | 0.006403858           | 88.34311989             | 88.3449825              | 0.143684098 | 16.4911368         | 5.73975E-06              |
|                | 4 7   | 0.009218502           | 101.894607              | 101.8895702             | 0.143684098 | 19.05637806        | 3.25411E-06              |
| <b>OTrPhCz</b> | 4 8   | 0                     | 117.4492186             | 117.4492186             | 0.143684098 | 9.932800055        | 9.54722E-06              |
|                | 4 9   |                       |                         |                         | 0.143684098 |                    | -6.96716E-               |
|                |       | 0.009218502           | 135.6673024             | 135.6608056             |             | 12.55878583        | 06                       |
|                | 4 10  | 72.45478526           | 76.99801008             | 89.49005126             | 0.143684098 | 22.40229619        | 6.78176E-07              |
|                | 4 11  | 72.44925987           | 90.0744443              | 99.37572677             | 0.143684098 | 11.76640124        | 4.76703E-06              |
|                | 4 12  |                       |                         |                         | 0.143684098 |                    | -                        |
|                |       | 72.44916261           | 149.5638564             | 133.3118266             |             | 5.881216889        | 0.000186838              |
|                | 4 13  | 72.44925987           | 105.4704405             | 75.79106148             | 0.143684098 | 17.22243902        | 2.51568E-06              |

|      |             |             |             |             |             |             |
|------|-------------|-------------|-------------|-------------|-------------|-------------|
| 4 14 | 72.44916261 | 142.1752225 | 80.05443792 | 0.143684098 | 12.21613009 | 1.00622E-05 |
| □    | □           | □           | □           | □           | □           | □           |

| Compounds | Dimer | $\alpha$ (°) | $\theta_1$ (°) | $\theta_2$ (°) | M (Debye)   | r (Å)       | $\Delta\epsilon$ (eV) |
|-----------|-------|--------------|----------------|----------------|-------------|-------------|-----------------------|
| OTrPhCz   | 13 0  | 44.61314215  | 90.36847137    | 67.79604934    | 0.360107151 | 10.50159667 | 0.000100655           |
|           | 13 1  | 44.61314215  | 107.079463     | 122.2179215    | 0.360107151 | 13.32453189 | 1.65902E-05           |
|           | 13 2  | 78.63158819  | 47.77767219    | 122.4653243    | 0.360107151 | 12.99544873 | 9.44884E-05           |
|           | 13 3  | 78.63158819  | 106.1138356    | 168.12932      | 0.360107151 | 13.54855675 | -4.02615E-05          |
|           | 13 4  | 78.63158819  | 48.82486868    | 56.50503946    | 0.360107151 | 7.42328201  | 0.000353816           |
|           | 13 5  | 78.63158819  | 155.5749415    | 105.1720617    | 0.360107151 | 8.353850499 | 0.000143965           |
|           | 13 6  | 36.15113149  | 54.34785537    | 90.40410047    | 0.360107151 | 21.69712247 | 1.30101E-05           |
|           | 13 7  | 36.15113149  | 89.59589713    | 125.6521422    | 0.360107151 | 21.69712219 | 1.30101E-05           |
|           | 13 8  | 36.15113149  | 39.09702072    | 70.99497931    | 0.360107151 | 11.33981615 | 5.47712E-06           |
|           | 13 9  | 36.15113149  | 109.0050168    | 140.9029754    | 0.360107151 | 11.33981559 | 5.47714E-06           |
|           | 13 10 | 36.15113149  | 61.62447344    | 43.68958151    | 0.360107151 | 10.42559337 | -3.19684E-05          |
|           | 13 11 | 36.15113149  | 136.3104147    | 118.3755227    | 0.360107151 | 10.42559276 | -3.19684E-05          |
|           | 13 12 | 0            | 72.36417305    | 72.36417305    | 0.360107151 | 12.69399977 | 5.74254E-05           |
|           | 13 14 | 8.53774E-07  | 107.635827     | 107.635827     | 0.360107151 | 12.6940012  | 5.74254E-05           |
| □         | □     | □            | □              | □              | □           | □           |                       |

| Compounds | Dimer | $\alpha$ (°) | $\theta_1$ (°) | $\theta_2$ (°) | M (Debye)   | r (Å)       | $\Delta\epsilon$ (eV) |
|-----------|-------|--------------|----------------|----------------|-------------|-------------|-----------------------|
| OTrPhCzBr | 7 0   | 72.45936892  | 75.55815692    | 33.70780037    | 0.425023293 | 12.60174883 | -3.62231E-05          |
|           | 7 1   | 72.45936892  | 146.2914965    | 104.4425962    | 0.425023293 | 12.60174819 | -3.62261E-05          |
|           | 7 2   | 72.45936892  | 46.64887836    | 64.9373454     | 0.425023293 | 12.27497538 | -6.97134E-05          |
|           | 7 3   | 72.45936892  | 115.0611991    | 133.3508926    | 0.425023293 | 12.27497472 | -6.97072E-05          |
|           | 7 4   | 8.53774E-07  | 64.20231411    | 64.20231411    | 0.425023293 | 19.16923383 | 1.38429E-05           |
|           | 7 5   | 8.53774E-07  | 125.6648153    | 125.6648153    | 0.425023293 | 9.062000155 | -6.01273E-06          |
|           | 7 6   | 0            | 36.23039207    | 36.23039207    | 0.425023293 | 16.89200044 | -4.46019E-05          |
|           | 7 8   | 115.1193373  | 63.20466773    | 146.8770352    | 0.425023293 | 18.91941832 | 2.36123E-05           |
|           | 7 9   | 115.1223327  | 59.58113419    | 136.624884     | 0.425023293 | 19.31117909 | 2.13072E-05           |
|           | 7 10  | 115.1193373  | 114.6553071    | 94.82616782    | 0.425023293 | 12.21817807 | -6.5589E-05           |
|           | 7 11  | 115.1223327  | 107.4733253    | 86.50772301    | 0.425023293 | 12.81643958 | -3.96523E-05          |
|           | 7 12  | 115.1193373  | 44.3355869     | 126.9771547    | 0.425023293 | 19.31118519 | 2.71594E-05           |
|           | 7 13  | 115.1223327  | 37.24384157    | 121.2249348    | 0.425023293 | 18.91941493 | 2.71251E-05           |
|           | 7 14  | 115.1193373  | 89.16570543    | 75.5347974     | 0.425023293 | 12.81644877 | -4.67029E-05          |
|           | 7 15  | 115.1223327  | 83.25400606    | 65.79406065    | 0.425023293 | 12.21817282 | -7.04481E-05          |
|           | 7 16  | 172.1425228  | 50.60938683    | 136.3340339    | 0.425023293 | 7.214087569 | 0.000232498           |
|           | 7 17  | 172.1425228  | 142.8894477    | 32.21500785    | 0.425023293 | 11.34558101 | 0.000159799           |

---

|      |             |             |             |             |             |              |
|------|-------------|-------------|-------------|-------------|-------------|--------------|
| 7 18 | 172.1425228 | 20.64467895 | 153.6999372 | 0.425023293 | 10.53833929 | 0.000294456  |
| 7 19 | 172.1425228 | 105.9459349 | 66.92577155 | 0.425023293 | 13.70166938 | -5.86047E-05 |

---

[S1] M. J. Frisch, G. W. Trucks, H. B. Schlegel, G. E. Scuseria, M. A. Robb, J. R. Cheeseman, G. Scalmani, V. Barone, G. A. Petersson, H. Nakatsuji, X. Li, M. Caricato, A. V. Marenich, J. Bloino, B. G. Janesko, R. Gomperts, B. Mennucci, H. P. Hratchian, J. V. Ortiz, A. F. Izmaylov, J. L. Sonnenberg, D. Williams-Young, F. Ding, F. Lipparini, F. Egidi, J. Goings, B. Peng, A. Petrone, T. Henderson, D. Ranasinghe, V. G. Zakrzewski, J. Gao, N. Rega, G. Zheng, W. Liang, M. Hada, M. Ehara, K. Toyota, R. Fukuda, J. Hasegawa, M. Ishida, T. Nakajima, Y. Honda, O. Kitao, H. Nakai, T. Vreven, K. Throssell, J. A. Montgomery, Jr., J. E. Peralta, F. Ogliaro, M. J. Bearpark, J. J. Heyd, E. N. Brothers, K. N. Kudin, V. N. Staroverov, T. A. Keith, R. Kobayashi, J. Normand, K. Raghavachari, A. P. Rendell, J. C. Burant, S. S. Iyengar, J. Tomasi, M. Cossi, J. M. Millam, M. Klene, C. Adamo, R. Cammi, J. W. Ochterski, R. L. Martin, K. Morokuma, O. Farkas, J. B. Foresman, and D. J. Fox, Gaussian, Inc., Wallingford CT, 2016.

[S2] Humphrey W., Dalke A. and Schulten K., VMD: Visual molecular dynamics, J. Molec. Graphics, 1996, 14, 1, 33-38.

[S3] Lu Tian, Chen Feiwu, Multiwfn: A multifunctional wavefunction analyzer, J. Comput. Chem., 2012, 33, 5, 580-592.
